# Supplementary material for: Highly Efficient Photoelectrocatalytic Reduction of CO2 to Methanol by a p–n Heterojunction CeO2/CuO/Cu Catalyst
Source: PubMed Central journal article supplement (PMC7770658; doi:10.1007/s40820-019-0354-1), 2020-01-09
Supplement: 40820_2019_354_MOESM1_ESM.pdf [file 40820_2019_354_MOESM1_ESM.pdf]

Supporting Information for

## Highly Efficient Photoelectrocatalytic Reduction of CO<sub>2</sub> to Methanol by a p-n Heterojunction CeO<sub>2</sub>/CuO/Cu Catalyst

Zhengbin Pan<sup>1,2,#</sup>, Ershuan Han<sup>1,2,#</sup>, Jingui Zheng<sup>2</sup>, Jing Lu<sup>2</sup>, Xiaolin Wang<sup>2</sup>, Yanbin Yin<sup>2</sup>, Geoffrey I.N. Waterhouse<sup>2,3,\*</sup>, Xiuguo Wang<sup>1,\*</sup>, Peiqiang Li<sup>2,\*</sup>

<sup>1</sup>Tobacco Research Institute of Chinese Academy of Agricultural Sciences (CAAS), Qingdao 266101, People's Republic of China

<sup>2</sup>College of Chemistry and Material Science, Shandong Agricultural University, Tai'an 271018, People's Republic of China

<sup>3</sup>School of Chemical Sciences, The University of Auckland, Auckland 1142, New Zealand

<sup>#</sup>Zhengbin Pan and Ershuan Han contributed equally to this work

\*Correspondence authors. Email: wangxiuguo@caas.cn (Xiuguo Wang); chem\_carbon@outlook.com (Peiqiang Li)

### Supplementary Figures

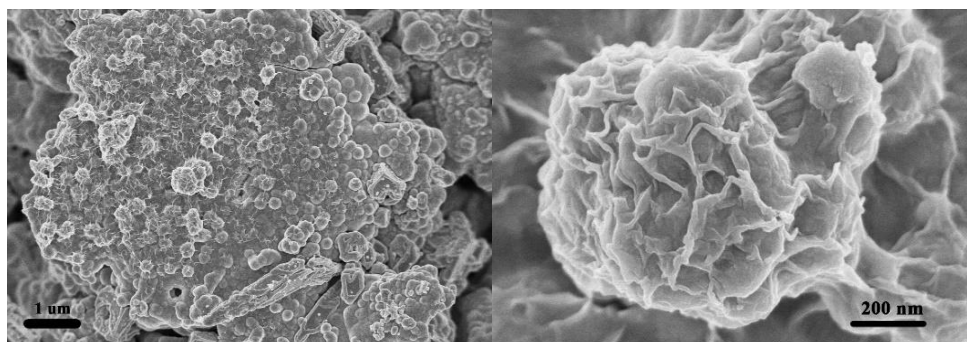

**Fig. S1** SEM images of flower-like CeO<sub>2</sub> NPs/CuO NPs

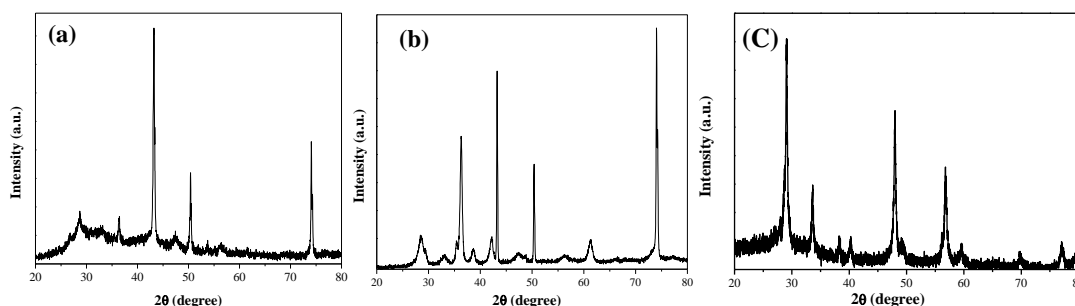

**Fig. S2** XRD patterns for **a** CuO **b** flower-like CeO<sub>2</sub> NPs/CuO, and **c** CeO<sub>2</sub> NPs

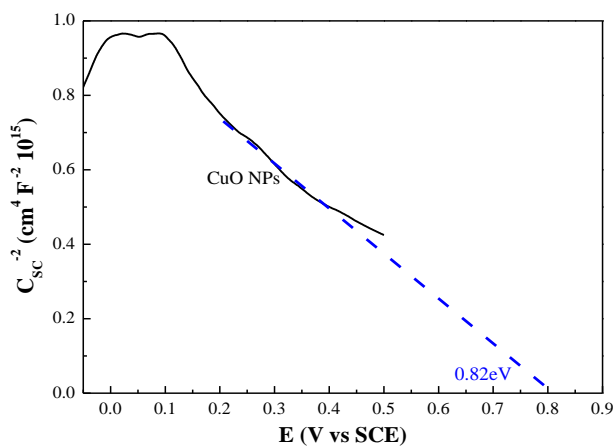

Fig. S3 Mott-Schottky plots for CuO NPs

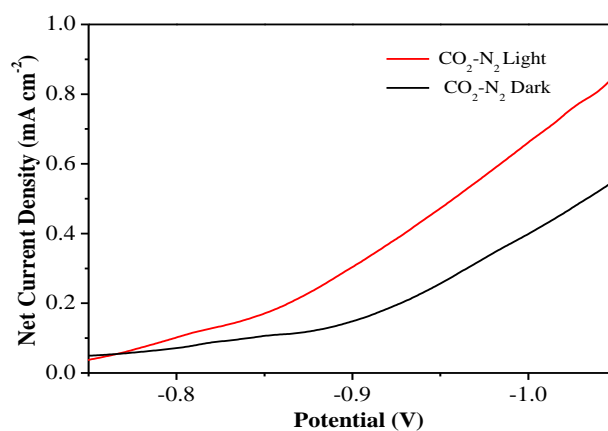

Fig. S4 The net current density of CeO<sub>2</sub> NPs/CuO NPs

Table 1 The XPS results of Ce 3d

| Peak                                                      | Ce               | Peak              | Binding energy | Ratio |
|-----------------------------------------------------------|------------------|-------------------|----------------|-------|
| Label                                                     | Valence state    | Characteristics   | (eV)           | (%)   |
| $\mu'''$                                                  | Ce <sup>4+</sup> | 3d <sub>3/2</sub> | 912.50         | 9.84  |
| $\mu''$                                                   | Ce <sup>4+</sup> | 3d <sub>3/2</sub> | 904.09         | 5.87  |
| $\mu'$                                                    | Ce <sup>3+</sup> | 3d <sub>3/2</sub> | 900.46         | 17.64 |
| $\mu$                                                     | Ce <sup>4+</sup> | 3d <sub>3/2</sub> | 897.17         | 17.31 |
| $\nu'''$                                                  | Ce <sup>4+</sup> | 3d <sub>5/2</sub> | 894.29         | 9.58  |
| $\nu''$                                                   | Ce <sup>4+</sup> | 3d <sub>5/2</sub> | 885.14         | 5.72  |
| $\nu'$                                                    | Ce <sup>3+</sup> | 3d <sub>5/2</sub> | 881.75         | 17.18 |
| $\nu$                                                     | Ce <sup>4+</sup> | 3d <sub>5/2</sub> | 878.46         | 16.86 |
| Ce <sup>3+</sup> / (Ce <sup>4+</sup> + Ce <sup>3+</sup> ) |                  |                   |                | 34.82 |
